# Supplementary material for: Screening and Validation of Internal Reference Genes for Quan-Titative Real-Time PCR Analysis of Leaf Color Mutants in Den-Drobium Officinale
Source: Preprints.org preprint supplement (doi:10.20944/preprints202305.0337.v1), 2023-05-05
Supplement: Supplementary file 1 [file supplementary]

## Sheet: Table S1
Table S1. List of the ten candidate reference genes with their FPKM expression values.
No.	Gene ID	Fragments Kilobase of transcript per Million mapped (FPKM) reads						Blast results	Gene
		CK_1	CK_2	CK_3	Yell_1	Yell_2	Yell_3
1	Dca001964	1278.08	1441.29	1403.64	2179.57	1349.08	2383.87	Actin 7 (Dendrobium officinale)（D.catenatum，∗XP_020703623.1）	Actin
2	Dca026050	370.94	399.24	447.29	905.47	263.03	662.22	Polyubiquitin 10 (Urartu wheat)（Triticum urartu，∗EMS54972.1 ）	UBQ
3	Dca023846	2432.48	2722.01	2821	3498.32	3953.24	4477.55	3-Glyceraldehyde phosphate dehydrogenase (Dendrobium officinale)（D.catenatum，∗PKU61536.1）	GAPDH
4	Dca018404	1418.85	1451.01	1167.97	2000.4	1566.58	2066.78	Transcription elongation factor (Dendrobium officinale)（D.catenatum，∗XP_020702187.1）	EF1α
5	Dca005689	481.53	569.86	525.04	699.61	453.59	765.61	TubulinβChain (Dendrobium officinale)（D.catenatum，∗XP_020673140.1）	β-TUB
6	Dca020925	342.26	376.03	309.97	364.14	268.92	278.3	TubulinαChain (Dendrobium officinale)（D.catenatum，∗XP_020687421.1）	α-TUB
7	Dca004695	155.06	171.16	144.68	293.15	222.06	353.68	60S ribosomal protein l13a-4 (Dendrobium officinale)（D.catenatum，∗XP_020674029.1）	RPL13AD
8	Dca019854	313.68	410.51	444.93	655.78	181.05	358.41	Water protein channel pip1-2 (Dendrobium officinale)（D.catenatum，∗XP_020687648.1）	PIP1-2
9	Dca007780	213.99	201.05	199.6	367.18	402.29	384.16	Intimal protein ppf-1 (Dendrobium officinale)（D.catenatum，∗XP_020704870.1）	ALB3
10	Dca003487	248.78	251.79	250.33	316.33	171.75	357.91	Cyclin B1-2 (Dendrobium officinale)（D.catenatum，∗XP_020681758.1）	CYCB1-2

## Sheet: Table S2
Table S2. List of the fifteen chlorophyll pathway-related genes with their FPKM expression values.
Serial number	Gene ID	Fpkm value						Gene expression (compared with green leaves)	KEGG pathway
NO.	Gene ID	CK_1	CK_2	CK_3	Yell_1	Yell_2	Yell_3	Gene expression	Biosynthetic pathways
1	Dca001861	15.8	12.32	12.7	31.7	35.85	44.3	up	Chlorophyll synthesis pathway
2	Dca002293	121.49	95.94	15.96	0	1.1	0	down	Chlorophyll synthesis pathway
3	Dca002994	105.46	92.53	89.6	113.37	150.13	121.16	up	Chlorophyll synthesis pathway
4	Dca003472	492.64	368.5	412.18	159.4	344.53	122.61	down	Chlorophyll synthesis pathway
5	Dca004000	42.84	40.18	37.2	95.78	107.46	118.78	up	Chlorophyll synthesis pathway
6	Dca007010	639.04	596.88	627.69	161.13	293.46	161.03	down	Chlorophyll synthesis pathway
7	Dca007427	228.85	191.43	238.06	68.83	122.3	70.2	down	Chlorophyll synthesis pathway
8	Dca009299	3.44	2.36	1.99	0.1	0.84	0.35	down	Chloroplast development protein
9	Dca010603	23.16	22.58	18.61	105.88	29.82	98.52	up	transcription factor
10	Dca013248	177.93	145.35	116.03	254.16	278.54	272.77	up	Chlorophyll synthesis pathway
11	Dca015453	384.25	344.92	315	191.97	320.75	156.79	down	Chlorophyll synthesis pathway
12	Dca020330	5.33	3.47	3.36	6.8	16.21	9.04	up	Chlorophyll synthesis pathway
13	Dca020854	113.85	93.58	84.55	153.76	193.89	185.11	up	Chlorophyll synthesis pathway
14	Dca022104	10239.6	6644.87	6182.16	139.22	428.53	174.55	down	Chloroplast development protein
15	Dca024845	200.55	148.75	169.85	513.26	1481.3	1681.88	up	Chloroplast development protein

## Sheet: Table S3
Table S3. Primers of the fifteen chlorophyll pathway-related genes for qRT-PCR analysis.
No	Genes	Primers (5′-3′)	Product length (bp)	Tm value/℃
1	Dca001861	F: CACAAAGTCACCTGCGTT；	97	60
		R: CGACGAGTGGCTTGTTAT
2	Dca002293	F: GTGCCCAAATAGGGACATC；	94	60
		R: AGAACCAGTCACAAATCGG
3	Dca002994	F: CCACCAGCTCTCTCTTTAC；	111	60
		R: ACCACTAACAACTGTCGG
4	Dca003472	F: CGACGAGAGCGTATCTACA；	99	60
		R: AGAACTGCGTGCTAGTAAAG
5	Dca004000	F: GATGGATCTCAGCTCCCT；	102	60
		R: GCCATTATTCCTGCATTGTCTA
6	Dca007010	F: CATGGCTTCGCCGCTTATTA；	91	60
		R: TGAACTCCAGCGATCCATGA
7	Dca007427	F: ACATGGACTTCTCTTGGACA；	80	60
		R: TCCATCCCTTAGCAAAGGTT
8	Dca009299	F: CTGCTGGTATAGTAAGCAGAAT；	81	60
		R: GACGTCCTTCTGAAGCATC
9	Dca010603	F: TGGGAGGACTGACAACGA；	87	60
		R: TCCAGCCGGTACATAGGT
10	Dca013248	F: AGCGCCATACAATGACATAG；	81	60
		R: GGTTCAATTATCACAGCAGCAA
11	Dca015453	F: CAATGGAAGCTCAAGCGAT；	115	60
		R: TTGATTCGCTCGGCGTAA
12	Dca020330	F: GCTCCTCAATTCGCTTAGAAC；	113	60
		R: CATCCACGATTAAGCAGGTAAC
13	Dca020854	F: CCACATCTTCCATTGATCCTAT；R: AGTCCAAGCTAACAACATCG	91	60
		R: AGTCCAAGCTAACAACATCG
14	Dca022104	F: TTCGTGCAGGCCATCGTTA；	85	60
		R: CCCATGCGTTGTTGTTGA
15	Dca024845	F: GAGAGGATTTGGCAGCTCA；	102	60
		R: CGCCGCGAAATAACGGAA

## Sheet: Table S4
Table S4. Summary of the qRT-PCR Ct value of ten candidate genes.
No	Reference genes	Mean CT	Standard deviation SD	Coefficient of variation CV
1	Actin	22.241	0.519	0.02333
2	UBQ10	21.288	0.454	0.02134
3	GAPDH	18.858	0.41	0.02177
4	EF1α	21.493	0.338	0.01571
5	β-TUB	22.678	0.349	0.01537
6	α-TUB	23.386	0.338	0.01446
7	RPL13AD	26.915	0.35	0.01299
8	PIP1-2	23.571	0.666	0.02824
9	ALB3	26.069	0.811	0.0311
10	CYCB1-2	23.23	0.264	0.01135
